# Supplementary material for: Identification of NPB, NPW and Their Receptor in the Rat Heart
Source: MDPI journal article supplement (doi:10.3390/ijms21217827), 2020-10-22
Supplement: s1 [file s1]

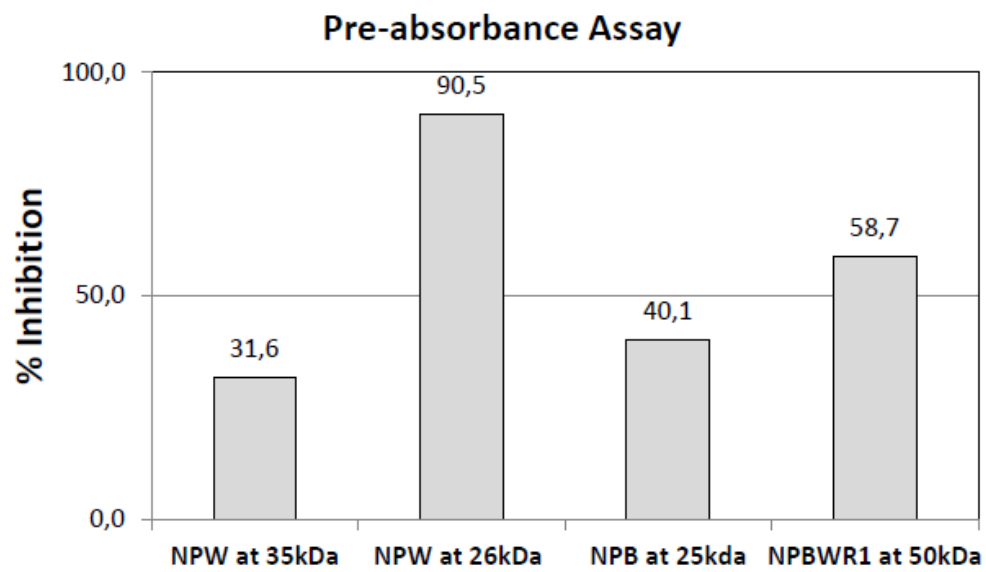

**Supplementary FigureS1:** Pre-adsorption Assay: Inhibition of commercially purchased antibodies by the synthetic peptides NPB (22–50), GPR7 (220–250), and NPW (33–62).
